# Supplementary material
Source: publisher figshare collection journal article supplement (https://plos.figshare.com/articles/dataset/_/132051)
Supplement: Supplementary file [file 1]

**Table S1. PCR primers for amplifying genomic fragments.**

| Primer      | Sequence                      | Position |        | Direction <sup>a</sup> | PCR product                |
|-------------|-------------------------------|----------|--------|------------------------|----------------------------|
|             |                               | Start    | end    |                        |                            |
| F1K         | GAAACTCTACCTGCACTTACATCTGAGC  | 917      | 944    | F                      | F1K + R8K PCR              |
| R8K         | CTATGTCTGCTCTAGGGTTCCTAACAGC  | 8333     | 8306   | R                      | F1K + R8K PCR              |
| F8K         | GCCCGCAAGAAACTCTGAAACAGGTG    | 7924     | 7949   | F                      | F8K + R15K PCR             |
| R15K        | CGTGTACCTTTACCCCAACTCTGTGG    | 15304    | 15279  | R                      | F8K + R15K PCR             |
| F15K        | GGGTCTTCTGTACAGAGAATGCCTAGC   | 14958    | 14984  | F                      | F15K + R21K PCR            |
| R21K        | CTCTGTTTAGTTCCTGTTGTGCCCTAGAG | 21618    | 21590  | R                      | F15K + R21K PCR            |
| F20K        | GTAGAGGTGCCAGAAGTACTAGCTGATG  | 20361    | 20388  | F                      | F20K + R26K PCR            |
| R26K        | CTGTTTAGCTGTTGAGCCATCGCTCTC   | 25957    | 25931  | R                      | F20K + R26K PCR            |
| F25K        | CAATAACGGTGAAGCAGAGAAGGTAAGC  | 24946    | 24973  | F                      | F25K + R31K PCR            |
| R31K        | GACCCTGTAAATCGTTAGCCCAAGCAGTG | 31693    | 31665  | R                      | F25K + R31K PCR            |
| F30K        | GAGCGACATTCTCGGACTATTACGCAAG  | 29975    | 30002  | F                      | F30K + R36K PCR            |
| R36K        | GGAGAAGGTTAAAACCCACCCGTTTCG   | 35892    | 35866  | R                      | F30K + R36K PCR            |
| F35K        | GGAGCACCTGCTGTAGAATTAGGAGC    | 34981    | 35006  | F                      | F35K + R41K PCR            |
| R41K        | CCTCTGTGCCTTCTCTAAACTTGGGAAC  | 41094    | 41067  | R                      | F35K + R41K PCR            |
| F40K        | GGACTACAGACCTGCAGGCATTAAGCTG  | 39821    | 39848  | F                      | F40K + gp41R PCR           |
| gp41R       | GCTTCTTACTCTTGACGGAGGAA       | 45662    | 45638  | R                      | F40K + gp41R PCR           |
| Sg2to3p11   | CGTGAATATCAGAAGGTGGGC         | 44711    | 44732  | F                      | Sg2to3p11 + R46K           |
| R46K        | CGCAGGGCTGAATTGGTATCCATCTG    | 46360    | 46335  | R                      | Sg2to3p11 + R46K           |
| F46K        | CTAAGGTGGGTATGTCAAGGAGCATG    | 46165    | 46190  | F                      | F46K + R53K PCR            |
| R53K        | GCTCTTGCTTGTCTAACAGAGGAG      | 53435    | 53411  | R                      | F46K + R53K PCR            |
| F53K        | GCTACCTATGTGGTGTATTATTGAGCC   | 53288    | 53314  | F                      | F53K + R60K PCR            |
| R60K        | GAACAGTTTTTCACATCACCTGAACACTG | 60153    | 60125  | R                      | F53K + R60K PCR            |
| F60K        | CAGAGATGCTCAGCTAATAGAAATACCAG | 60002    | 60030  | F                      | F60K + R68K PCR            |
| R68K        | GGTTGTAGTGAACCTAGGTGTACCACTG  | 68033    | 68007  | R                      | F60K + R68K PCR            |
| F68K        | GCGCAAAGGACTAGCACCTAACCC      | 67923    | 67946  | F                      | F68K + R76K PCR            |
| R76K        | CGTTATACCCACAACAGTCTGGCTCTG   | 75861    | 75835  | R                      | F68K + R76K PCR            |
| F1RVr5      | CAACGTGAGGGAGCTTATCTTG        | 72505    | 72526  | F                      | F1RVr5 + F1RVr9p3R5 PCR    |
| F1RVr9p3R5  | GAAACTTTGGGAGCTTGTGGC         | 77395    | 77375  | R                      | F1RVr5 + F1RVr9p3R5 PCR    |
| F1RVr9      | GTTAGGTGAGTATAAACACCTAGCCGTT  | 74826    | 74854  | F                      | F1RVr9 + F1RVr9p3R PCR     |
| F1RVr9p3R   | CTCCTCTTAGGTCTTCAATAGCATC     | 81526    | 81502  | R                      | F1RVr9 + F1RVr9p3R PCR     |
| F1RVr9p3    | GCGTAAGACACAAGGCGCAGAACCT     | 81324    | 81348  | F                      | F1RVr9p3 + F1RVr9p4SR1 PCR |
| F1RVr9p4SR1 | GCCACTACAACCTGTTAATGTTACAC    | 87362    | 87338  | R                      | F1RVr9p3 + F1RVr9p4SR1 PCR |
| F87K        | GTAGCAGGCTACACAGAGTCTACTTC    | 87199    | 87224  | F                      | F87K + R95K PCR            |
| R95K        | CCCTCGTAACCACCCATTCAGTTCTTC   | 94711    | 94685  | R                      | F87K + R95K PCR            |
| F95K        | GGGAATGGCTTTATCTGCCTTAAGTG    | 94572    | 94598  | F                      | F95K + R102K PCR           |
| R102K       | CTCCTCTATCTCTCCCCTATAAGTG     | 101792   | 101767 | R                      | F95K + R102K PCR           |
| F101K       | GAAGTGCCAGAAGAAAATAAGGACTTGCC | 101089   | 101117 | F                      | F101K + R108R PCR          |
| R108R       | CTTAGTCGTCATTAGTGGCTTGGTTGTG  | 108317   | 108290 | R                      | F101K + R108R PCR          |
| F108K       | GTCACCACTCTCCACAATGTAGTAGTC   | 108078   | 108104 | F                      | F108K + R115K PCR          |
| R115K       | CGTATCAGAGCTACTATTAGAAGAGGAGG | 115332   | 115304 | R                      | F108K + R115K PCR          |
| F115K       | GTACAGATGCTAGTAGTTCGTGGTCTTC  | 115044   | 115071 | F                      | F115K + R122K PCR          |
| R122K       | CAGAGCAACCAATTAATGAACGCACAGAG | 122317   | 122289 | R                      | F115K + R122K PCR          |
| F122K       | CTTCATCCGTCATGTGCTCTACTAATGTG | 121956   | 121984 | F                      | F122K + R130K              |
| R130K       | CAATTGATGCAATCATCCGCTCAGGAC   | 130004   | 129978 | R                      | F122K + R130K              |
| E5M4rp1     | GCATGACGAGACATCTCATGCTC       | 128013   | 128035 | F                      | B8M4p3' + E5M4rp1 PCR      |
| B8M4p3'     | GCGAAGTAGGGGTTTCAGAGTGTG      | 131769   | 131746 | R                      | B8M4p3' + E5M4rp1 PCR      |
| F130K       | CACCTACGATTGTAGTTACCCAACCATG  | 129747   | 129774 | F                      | F130K + R137K PCR          |
| R137K       | CTCTTAACATGCGAACCAAGGTAATCGG  | 136966   | 136939 | R                      | F130K + R137K PCR          |
| F137K       | GCATACCCTTCAATAGCTCGTTGAG     | 136301   | 136327 | F                      | F137K + R1K PCR            |
| R1K         | GAAATTAGCTCCTCTTCTTACCCTCC    | 1017     | 991    | R                      | F137K + R1K PCR            |

<sup>a</sup> “Forward” and “Reverse” are abbreviated as “F” and “R”, respectively.
