# Supplementary material
Source: publisher figshare collection journal article supplement (https://plos.figshare.com/articles/dataset/_/132051)
Supplement: Supplementary file [file 1]

**Table S2. List of genome sequencing primers.**

| No | PCR Fragment   | Primer           | Location |       | Direction | Sequence                   |
|----|----------------|------------------|----------|-------|-----------|----------------------------|
|    |                |                  | Start    | End   |           |                            |
| 1  | F1K + R8K PCR  | orf34 R1         | 1524     | 1505  | R         | CCTATGCCCGTTTAACAGAG       |
| 2  | F1K + R8K PCR  | Aftorf34 R1-p14  | 1304     | 1322  | F         | CACACCGACCTTGCAACC         |
| 3  | F1K + R8K PCR  | phiEF24C Lyt F2  | 1985     | 2002  | F         | GTATGACCGTGTACCTGC         |
| 4  | F1K + R8K PCR  | Aftorf34 R1-p16  | 2316     | 2332  | F         | GACAGATGGTACAACGG          |
| 5  | F1K + R8K PCR  | phiEF24C Lyt F5' | 3217     | 3238  | F         | GGGTGTCAACTCAATTAGCACC     |
| 6  | F1K + R8K PCR  | phiEF24C Lyt F6  | 3744     | 3762  | F         | GCTAAGGAACACTACGTAAGG      |
| 7  | F1K + R8K PCR  | phiEF24C Lyt F7  | 4400     | 4418  | F         | GCTACTGATGAGGACTACG        |
| 8  | F1K + R8K PCR  | phiEF24C Lyt F8  | 4942     | 4960  | F         | CAGTATGAGAGAGGGGCTG        |
| 9  | F1K + R8K PCR  | phiEF24C Lyt F9  | 5481     | 5498  | F         | GGTATCCCTATCGACACC         |
| 10 | F1K + R8K PCR  | phiEF24C Lyt F10 | 5961     | 5980  | F         | CCTACACCAAGCAAACCAAG       |
| 11 | F1K + R8K PCR  | LytNp2           | 6759     | 6778  | F         | CGCACCAGTAGCACCTGAAC       |
| 12 | F1K + R8K PCR  | LytN p2-2        | 7431     | 7454  | F         | GGTAACCCTGTAATTTATGATTAC   |
| 13 | F8K + R15K PCR | F8K              | 7924     | 7949  | F         | GCCCGCAAGAAACTCTGAAACAGGTG |
| 14 | F8K + R15K PCR | /kpn1 8k-M4p3    | 8514     | 8532  | F         | GGAGAAGCTCACTAGCCGG        |
| 15 | F8K + R15K PCR | /kpn1 8k-M4p4    | 9091     | 9110  | F         | GCTATCTGGTGGAGATGTAG       |
| 16 | F8K + R15K PCR | /kpn1 8k-M4p5    | 9648     | 9667  | F         | GGTGCCCAACTAGCAATTG        |
| 17 | F8K + R15K PCR | /kpn1 8k-M4p6    | 10202    | 10219 | F         | GGGGTAAGAAATAGTGCC         |
| 18 | F8K + R15K PCR | /kpn1 8k-M4p7    | 10773    | 10790 | F         | GAAGCGGAGTCTGTTGAG         |
| 19 | F8K + R15K PCR | /kpn1 8k-M4p8    | 11343    | 11361 | F         | GCTTCACTACAGGATATGG        |
| 20 | F8K + R15K PCR | /kpn1 8k-M4p9    | 11906    | 11922 | F         | GGTACACCAACAGATGC          |
| 21 | F8K + R15K PCR | /kpn1 8k-M4p10   | 12474    | 12491 | F         | CGGACGTATTCGTTGGAG         |
| 22 | F8K + R15K PCR | /kpn1 8k-M4p11   | 13033    | 13049 | F         | GAGGAAGACTAAGGAGG          |
| 23 | F8K + R15K PCR | /kpn1 8k M4rF    | 13518    | 13541 | F         | GTACCCAACATCCCTCATGCAGAC   |
| 24 | F8K + R15K PCR | /kpn1 8k M4rFp1  | 14000    | 14018 | F         | GGTGGAGCAGGTGAAACAG        |
| 25 | F8K + R15K PCR | /kpn1 8k M4rFp2  | 14453    | 14463 | F         | GGTAAAGACGGCGTATC          |
| 26 | F8K + R15K PCR | /kpn1 8k M4rFp3  | 14943    | 14962 | F         | GTTGCTCTACGTAATGGGTC       |
| 27 | F8K + R15K PCR | E4M4rp4          | 14113    | 14094 | R         | CCACAAAACGTCAATACCCC       |

*Continued on following page*

**Table S2 - Continued.**

| No | PCR Fragment    | Primer        | Location |       | Direction | Sequence                      |
|----|-----------------|---------------|----------|-------|-----------|-------------------------------|
|    |                 |               | Start    | End   |           |                               |
| 28 | F15K + R21K PCR | E4M4rp1       | 15717    | 15697 | R         | CTTCTTCGCTACTACCGAGAG         |
| 29 | F15K + R21K PCR | E4M4rp2       | 15162    | 15143 | R         | GAACTGCTCTCAGCTCATCG          |
| 30 | F15K + R21K PCR | E4RVp1        | 17580    | 17563 | R         | CGCATTGGGTACCATTG             |
| 31 | F15K + R21K PCR | E4RVp2        | 17050    | 17031 | R         | GTTGGCTTGAGCTTCACTAC          |
| 32 | F15K + R21K PCR | E4RVp3        | 16496    | 16480 | R         | CAGCATCCTCGTGTGG              |
| 33 | F15K + R21K PCR | E4RVp4        | 16017    | 15999 | R         | GGTATCCTTTGTAGACACC           |
| 34 | F15K + R21K PCR | E3M4rF4       | 21055    | 21037 | R         | CGATAGCCTCTGAATATC            |
| 35 | F15K + R21K PCR | E3M4rF4'      | 20575    | 20557 | R         | GCCACGCAGGGTCACTCGG           |
| 36 | F15K + R21K PCR | E3M4rF5       | 19824    | 19805 | R         | CTTCAACACGTTTCAACAACG         |
| 37 | F15K + R21K PCR | E3M4rF7       | 19157    | 19138 | R         | CCCTAACAAACCTTACACGC          |
| 38 | F15K + R21K PCR | E3M4rF8       | 18351    | 18335 | R         | CCTGTGTGGACTGTTTG             |
| 39 | F15K + R21K PCR | R21K          | 21618    | 21590 | R         | CTCTGTTTAGTTCCTGTTGTGCCCTAGAG |
| 40 | F20K + R26K PCR | F20K          | 20361    | 20388 | F         | GTAGAGGTGCCAGAAGTACTAGCTGATG  |
| 41 | F20K + R26K PCR | R26K          | 25957    | 25931 | R         | CTGTTTAGCTGTTGAGCCATCGCTCTC   |
| 42 | F20K + R26K PCR | E5RVrp6       | 20482    | 20500 | F         | GGTGAATAAAAAGCCCTCG           |
| 43 | F20K + R26K PCR | E5RVrp7       | 21180    | 21198 | F         | GTTGAGGCAATGACTGGGG           |
| 44 | F20K + R26K PCR | E5RVrp8       | 22011    | 22028 | F         | CGTGGTGTCTAGCTGAG             |
| 45 | F20K + R26K PCR | E5RVrp9       | 22800    | 22818 | F         | CAATCAGTTCCCGGTGACG           |
| 46 | F20K + R26K PCR | E3M4p1        | 23595    | 23612 | F         | GCTAAGCTAGGGGCAATG            |
| 47 | F20K + R26K PCR | E1RVp1        | 24973    | 24954 | R         | GCTTACCTTCTCTGCTCAC           |
| 48 | F20K + R26K PCR | E1RVp2        | 24432    | 24414 | R         | CTGGGCTAGTTATGTGTCC           |
| 49 | F20K + R26K PCR | E1RVp3'       | 23896    | 23879 | R         | GCAGACTCTTCTGCGTTG            |
| 50 | F20K + R26K PCR | A2RVr1        | 25950    | 25931 | R         | GCTGTTGAGCCATCGCTCTC          |
| 51 | F25K + R31K PCR | F25K          | 24946    | 24973 | F         | CAATAACGGTGAAGCAGAGAAGGTAAGC  |
| 52 | F25K + R31K PCR | R26K          | 25957    | 25931 | R         | CTGTTTAGCTGTTGAGCCATCGCTCTC   |
| 53 | F25K + R31K PCR | outH1RVp2     | 29471    | 29452 | R         | CTGTCAACCTCGTAGGTTTC          |
| 54 | F25K + R31K PCR | outH1RVp3     | 28915    | 28899 | R         | CTCTGCCATCTGGTGTC             |
| 55 | F25K + R31K PCR | outH1RVp4     | 28379    | 28361 | R         | GCTATCGGGTTAACCTGTC           |
| 56 | F25K + R31K PCR | outH1RVp5     | 27813    | 27795 | R         | GACTTCTGACCTCTAGTAG           |
| 57 | F25K + R31K PCR | outH1RVp6     | 27238    | 27222 | R         | GTAACCCCCGCACTAC              |
| 58 | F25K + R31K PCR | outH1RVp7     | 26715    | 26704 | R         | CCTCCGGAGAAGGTCTCAG           |
| 59 | F25K + R31K PCR | A2RVp7        | 28980    | 28996 | F         | CAACAATGAGGGGTTTCG            |
| 60 | F25K + R31K PCR | A2RVp8        | 29543    | 29561 | F         | CTAGCTCGGTAGACGGAGC           |
| 61 | F25K + R31K PCR | Pst1C2H1RVrF  | 31125    | 31102 | R         | GAACCCTACATAGTTGTACCCACC      |
| 62 | F25K + R31K PCR | Pst1C2H1RVrF1 | 30605    | 30585 | R         | GTAGCCTTGTACCTGCCTCG          |

*Continued on following page*

**Table S2 - Continued.**

| No | PCR Fragment     | Primer         | Location |       | Direction | Sequence                      |
|----|------------------|----------------|----------|-------|-----------|-------------------------------|
|    |                  |                | Start    | End   |           |                               |
| 63 | F30K + R36K PCR  | Pst1C2H1RVrF   | 31125    | 31102 | R         | GAACCTACATAGTTGTACCCACC       |
| 64 | F30K + R36K PCR  | Pst1C2H1RVrF1  | 30605    | 30585 | R         | GTAGCCTTTGTACCTGCCTCG         |
| 65 | F30K + R36K PCR  | R31K           | 31693    | 31665 | R         | GACCCTGTAAATCGTTAGCCCAAGCAGTG |
| 66 | F30K + R36K PCR  | H1RVr          | 33408    | 33386 | R         | GTAGCCTGAAAACCTTTGGGGAG       |
| 67 | F30K + R36K PCR  | H1RVrp1        | 32874    | 32855 | R         | CGCCCCGTCTTCCTTGTTAG          |
| 68 | F30K + R36K PCR  | H1RVrp2        | 32338    | 32320 | R         | CATCCAGAAGTCTAACCC            |
| 69 | F30K + R36K PCR  | C2H1M5rRp6'    | 33947    | 33924 | R         | ACTCTCCACTCTTTAGCTAGTAAC      |
| 70 | F30K + R36K PCR  | Pst1c2H1M5rRp5 | 34590    | 34571 | R         | CGACATTGTGTTCCCTGCTG          |
| 71 | F30K + R36K PCR  | H1M5rp1        | 34231    | 34248 | F         | GCCCATTTGGACGTAATTG           |
| 72 | F30K + R36K PCR  | F35K           | 34981    | 35006 | F         | GGAGCACCTGCTGTAGAATTAGGAGC    |
| 73 | F35K + R41K PCR  | F35K           | 34981    | 35006 | F         | GGAGCACCTGCTGTAGAATTAGGAGC    |
| 74 | F35K + R41K PCR  | H1M5rp4        | 35796    | 35814 | F         | GCTTTGGAAAGGGGTTGTC           |
| 75 | F35K + R41K PCR  | H1M5rp5        | 36346    | 36365 | F         | GGGACTGTGAAGAGACCTAC          |
| 76 | F35K + R41K PCR  | H1M5rp6        | 36853    | 36875 | F         | GGAGGTGATATTTCTATGTACCC       |
| 77 | F35K + R41K PCR  | Sg2to3p1       | 37526    | 37543 | F         | GCACCAGAAGGGCTATCC            |
| 78 | F35K + R41K PCR  | Sg2to3'        | 37362    | 37386 | F         | CAGGATTCAGGGTAGACAGCAGAGG     |
| 79 | F35K + R41K PCR  | Sg2to3p2       | 38301    | 38319 | F         | CTATGGATGTCGCTCTAGG           |
| 80 | F35K + R41K PCR  | Sg2to3p3       | 39036    | 39057 | F         | CAAAACGATAACTCGGGGGCTC        |
| 81 | F35K + R41K PCR  | Sg2to3p4       | 39515    | 39540 | F         | CATACCTAAAGGAAGAATCAATCGGG    |
| 82 | F35K + R41K PCR  | Sg2to3p5       | 40367    | 40386 | F         | CCGTAAAGATGGTTGGGACG          |
| 83 | F40K + gp41R PCR | F40K           | 39821    | 39848 | F         | GGACTACAGACCTGCAGGCATTAACCTG  |
| 84 | F40K + gp41R PCR | Sg2to3p5       | 40367    | 40386 | F         | CCGTAAAGATGGTTGGGACG          |
| 85 | F40K + gp41R PCR | Sg2to3p6       | 41190    | 41213 | F         | GCATTGAACACCCTATTAGGGAAC      |
| 86 | F40K + gp41R PCR | Sg2to3p7       | 41920    | 41942 | F         | CGCTAATTCAGATGAGGACGGC        |
| 87 | F40K + gp41R PCR | Sg2to3p8       | 42615    | 42636 | F         | GTGGTGTTCCTAGCCATTCTC         |
| 88 | F40K + gp41R PCR | Sg2to3p9       | 43335    | 43355 | F         | CTGGTGAAGGCGATGCTAGGG         |
| 89 | F40K + gp41R PCR | Sg2to3p10      | 44023    | 44045 | F         | CCCTTCTGCAGATAACTGGATTG       |
| 90 | F40K + gp41R PCR | Sg2to3p11      | 44711    | 44732 | F         | CGTGGAATATCAGAAGGTGGGC        |
| 91 | F40K + gp41R PCR | gp41R          | 45662    | 45638 | R         | GTCTTCTTACTCTTGGACGGAGGAA     |
| 92 | Sg2to3p11 + R46K | Sg2to3p11      | 44711    | 44732 | F         | CGTGGAATATCAGAAGGTGGGC        |
| 93 | Sg2to3p11 + R46K | gp42F1         | 45777    | 45801 | F         | cacagacaaacaagctcaggtgcgc     |
| 94 | Sg2to3p11 + R46K | gp42R1         | 45888    | 45864 | R         | gttcttctactctctgttctctc       |

*Continued on following page*

**Table S2 - Continued.**

| No  | PCR Fragment    | Primer   | Location |       | Direction | Sequence                      |
|-----|-----------------|----------|----------|-------|-----------|-------------------------------|
|     |                 |          | Start    | End   |           |                               |
| 95  | F46K + R53K PCR | F46K     | 46165    | 46190 | F         | CTAAGGTGGGTATGTCAAGGAGCATG    |
| 96  | F46K + R53K PCR | F2RVp2   | 46412    | 46429 | F         | GATACGTTCCCCACAGGG            |
| 97  | F46K + R53K PCR | F2M4r1   | 46817    | 46840 | F         | GTAGGTGCTTTTGGTGCAGGTAAG      |
| 98  | F46K + R53K PCR | F2M4r2   | 47293    | 47312 | F         | CGCTCAGTATAGAATGGCAC          |
| 99  | F46K + R53K PCR | F2M4r3   | 47840    | 47857 | F         | GGTCGGGGCTTACGTAAG            |
| 100 | F46K + R53K PCR | F2M4r4   | 48419    | 48438 | F         | GCGGAGATAGCTGAGGCACG          |
| 101 | F46K + R53K PCR | F2M4r5   | 49226    | 49241 | F         | CGTGGGGCTAACTCAACAC           |
| 102 | F46K + R53K PCR | F2M4r6   | 49924    | 49944 | F         | GTCTTTGAGGTAGTTAGCGAC         |
| 103 | F46K + R53K PCR | F2M4r7   | 50259    | 50280 | F         | GCTAGCTCGTGGAGAAGTCGGG        |
| 104 | F46K + R53K PCR | F2M4r8   | 50879    | 50900 | F         | CATCAGAGGAGTTTAGTAACGG        |
| 105 | F46K + R53K PCR | F2M4r9   | 51556    | 51576 | F         | GTTATGGGGAACAGGTCGAAG         |
| 106 | F46K + R53K PCR | F2M4r10  | 52189    | 52211 | F         | GTTTGAGAGAGGCAATGGAAGTG       |
| 107 | F46K + R53K PCR | F2M4r11  | 52846    | 52867 | F         | GGTGTTTACCGATATGCACAGG        |
| 108 | F53K + R60K PCR | F53K     | 53435    | 53411 | F         | GCTACCTATGTGGTGCTTTATTGAGCC   |
| 109 | F53K + R60K PCR | E7RVp1   | 54796    | 54779 | R         | GTAGCCTTTTCCTCTCTG            |
| 110 | F53K + R60K PCR | E7M4p1   | 54061    | 54079 | F         | GCAATGGTTGTGAGAACG            |
| 111 | F53K + R60K PCR | E7M4p2   | 54779    | 54796 | F         | CAGAGAGGAAAAGGCTAC            |
| 112 | F53K + R60K PCR | E7M4p3   | 55305    | 55333 | F         | CTAAGTCAGAACCTGAGAGAGCCAGAAGC |
| 113 | F53K + R60K PCR | E7M4p3p1 | 56011    | 56032 | F         | CTACGCTGTACAGACGATAAAG        |
| 114 | F53K + R60K PCR | E7M4p3p2 | 56816    | 56837 | F         | GTTCGTTGGGACTACGAAACC         |
| 115 | F53K + R60K PCR | E7M4p3p3 | 57580    | 57602 | F         | GAAAAACACCAGTGCAGTGTAAAC      |
| 116 | F53K + R60K PCR | E7M4p3p4 | 58366    | 58384 | F         | CGAAACAAACGTATCGGGG           |
| 117 | F53K + R60K PCR | E7M4p3p5 | 59171    | 59192 | F         | GTAGACGACTACAAGGACACTC        |
| 118 | F53K + R60K PCR | E9M5R7   | 57708    | 57689 | R         | GTCTGCCATCCCTACATAAG          |
| 119 | F53K + R60K PCR | E9M5R8   | 56977    | 56957 | R         | GGGAATAACTACTCCATCGTC         |

*Continued on following page*

**Table S2 - Continued.**

| No  | PCR Fragment    | Primer     | Location |       | Direction | Sequence                      |
|-----|-----------------|------------|----------|-------|-----------|-------------------------------|
|     |                 |            | Start    | End   |           |                               |
| 120 | F60K + R68K PCR | F60K       | 60002    | 60030 | F         | CAGAGATGCTCAGCTAATAGAAATACCAG |
| 121 | F60K + R68K PCR | E3M4p3p7   | 60657    | 60677 | F         | GCTATGAGACAGAGAGATTG          |
| 122 | F60K + R68K PCR | E3M4p3p8   | 61438    | 61459 | F         | CTAGTGTCATAGAGCAACAGAG        |
| 123 | F60K + R68K PCR | E7M4p3p9   | 62174    | 62193 | F         | CGTGGTGACTTATTAGGGGC          |
| 124 | F60K + R68K PCR | E9M5in     | 62674    | 62698 | F         | GCTTATTGGTAAACCTACTAAGTCC     |
| 125 | F60K + R68K PCR | E9M4p1     | 63088    | 63107 | F         | CTACAAAGAGGGGCTTAAAG          |
| 126 | F60K + R68K PCR | E9M4p2     | 63567    | 63585 | F         | GTAGTAAGGTTGGAGACCC           |
| 127 | F60K + R68K PCR | E9M4p3     | 64094    | 64111 | F         | CAAGGAACCTGGTGCTAC            |
| 128 | F60K + R68K PCR | E9M4p6     | 64763    | 64788 | F         | GTGAGAACAGCATTTTTAGAGCAACC    |
| 129 | F60K + R68K PCR | E9RVrFp1   | 65408    | 65425 | F         | GCAGTACCGGGAGAAAAC            |
| 130 | F60K + R68K PCR | E9RVrFp2   | 65918    | 65936 | F         | GCATTACCACAAGGTTGGG           |
| 131 | F60K + R68K PCR | E9RVrFp3   | 66487    | 66506 | F         | CACACCTAGTGTAGACGACC          |
| 132 | F60K + R68K PCR | E9RVrFp4   | 67013    | 67030 | F         | GAACGTGTAGCAGAAGAG            |
| 133 | F60K + R68K PCR | F1M4p1     | 67786    | 67803 | F         | GGAACAACCTAACCAAGC            |
| 134 | F60K + R68K PCR | 17RVRp1    | 67923    | 67946 | F         | GCGCAAAGGACTAGCACCTAACCC      |
| 135 | F68K + R76K PCR | F1RVp2     | 68631    | 68612 | R         | GCGGTATCTCGGAACCGTCC          |
| 136 | F68K + R76K PCR | F1M4p2'    | 68792    | 68811 | F         | GGAACAGTAAGGGATTCTCG          |
| 137 | F68K + R76K PCR | F1M4p3     | 69373    | 69391 | F         | GATGGGTACTGGAACCG             |
| 138 | F68K + R76K PCR | F1RVr1     | 70132    | 70151 | F         | GCAAGCGGTGACGTTGTAGC          |
| 139 | F68K + R76K PCR | F1RVr3     | 70958    | 70980 | F         | CATTAGTGGGTTTGTAGAGGCGG       |
| 140 | F68K + R76K PCR | F1RVr4     | 71830    | 71849 | F         | GCATGTTAACGAAGTAGCCC          |
| 141 | F68K + R76K PCR | F1RVr5     | 72505    | 72526 | F         | CAACGTGAGGGAGCTTATCTTG        |
| 142 | F68K + R76K PCR | F1RVr6     | 73233    | 73255 | F         | CATGGGGCATATCCATAACAAC        |
| 143 | F68K + R76K PCR | F1RVr8     | 74620    | 74632 | F         | CGAGGGCTCATTGGCATAG           |
| 144 | F68K + R76K PCR | F1RVr9p1   | 75492    | 75520 | F         | GCATTGGTAAGGAACCTGTAGTAAGCTG  |
| 145 | F68K + R76K PCR | F1RVp1     | 69084    | 69068 | R         | GGTAAAGGTTCCCAACC             |
| 146 | F68K + R76K PCR | F1RVp2     | 68631    | 68612 | R         | GCGGTATCTCGGAACCGTCC          |
| 147 | F68K + R76K PCR | SG2cl4SLr  | 74997    | 74973 | R         | CCCACCAGAACGGCTGTTTGTCTTC     |
| 148 | F68K + R76K PCR | SG2cl4SLr1 | 74543    | 74520 | R         | CCTATATCCCCGAATATTCCTTGC      |

*Continued on following page*

**Table S2 - Continued.**

| No  | PCR Fragment               | Primer      | Location |       | Direction | Sequence                        |
|-----|----------------------------|-------------|----------|-------|-----------|---------------------------------|
|     |                            |             | Start    | End   |           |                                 |
| 149 | F1RVr5 + F1RVr9p3R5 PCR    | F1RVr6      | 73233    | 73255 | F         | CATGGGGCATATCCATAACAAC          |
| 150 | F1RVr5 + F1RVr9p3R5 PCR    | F1RVr7      | 73914    | 73933 | F         | CATTAATCAGACGTGGGGTC            |
| 151 | F1RVr5 + F1RVr9p3R5 PCR    | F1RVr8      | 74620    | 74632 | F         | CGAGGGCTCATTGGCATAG             |
| 152 | F1RVr5 + F1RVr9p3R5 PCR    | F1RVr9      | 74826    | 74855 | F         | GTTAGGTGAGTATAAAACAACCTAGCCGTTT |
| 153 | F1RVr5 + F1RVr9p3R5 PCR    | F1RVr9p1    | 75492    | 75520 | F         | GCATTGGTAAGGAACCTGTAGGTAAGCTG   |
| 154 | F1RVRVr9 + F1RVr9p3R PCR   | F1RVr9p1    | 75492    | 75520 | F         | GCATTGGTAAGGAACCTGTAGGTAAGCTG   |
| 155 | F1RVRVr9 + F1RVr9p3R PCR   | F1RVr9p1-1  | 76277    | 76298 | F         | CAGACCAGTAGGAGAAAGACAG          |
| 156 | F1RVRVr9 + F1RVr9p3R PCR   | F1RVr9p2    | 76617    | 76644 | F         | GGTGTGCACACTACACCGAAGCACTAG     |
| 157 | F1RVRVr9 + F1RVr9p3R PCR   | F1RVr9p2-1  | 77375    | 77395 | F         | GCCACAAGCTCCCAAAGTTTC           |
| 158 | F1RVRVr9 + F1RVr9p3R PCR   | F1RVr9p2-2  | 78222    | 78241 | F         | GCTGTGCTGATTAAGAATGG            |
| 159 | F1RVRVr9 + F1RVr9p3R PCR   | F1RVr9p2-3  | 79116    | 79136 | F         | GCTCTAAGACTGTCATGAC             |
| 160 | F1RVRVr9 + F1RVr9p3R PCR   | F1RVr9p2-4  | 79906    | 79926 | F         | CTAAGGTAGACGAGGCGTTAG           |
| 161 | F1RVRVr9 + F1RVr9p3R PCR   | F1RVr9p2-5  | 80683    | 80703 | F         | GGTGTGTACCTGTTACGCAG            |
| 162 | F1RVRVr9 + F1RVr9p3R PCR   | F1RVr9p3    | 81324    | 81348 | F         | GCGTAAGACACAAGGCGCAGAACCT       |
| 163 | F1RVr9p3 + F1RVr9p4SR1 PCR | F1RVr9p4KR1 | 82537    | 82519 | R         | GTGGGTGATTCTCTACACG             |
| 164 | F1RVr9p3 + F1RVr9p4SR1 PCR | F1RVr9p4KR2 | 81711    | 81691 | R         | CCAAGCTTGCTTCATGTAGTC           |
| 165 | F1RVr9p3 + F1RVr9p4SR1 PCR | F1RVr9p4    | 81809    | 81833 | F         | CAGACCATATTGTTACCTTGATGC        |
| 166 | F1RVr9p3 + F1RVr9p4SR1 PCR | F1RVr9p4K1  | 82485    | 82506 | F         | CTATGCAGTACGTTACAGGAGAC         |
| 167 | F1RVr9p3 + F1RVr9p4SR1 PCR | F1RVr9p4K2  | 83353    | 83372 | F         | CGAGTGCCACGTAGAGGACG            |
| 168 | F1RVr9p3 + F1RVr9p4SR1 PCR | F1RVr9p4K3  | 83937    | 83956 | F         | GTAGATGGCGGTTTGGTAGC            |
| 169 | F1RVr9p3 + F1RVr9p4SR1 PCR | F1RVr9p4K4  | 84734    | 84755 | F         | CTGGTAAGGGAAGCTAAACTAC          |
| 170 | F1RVr9p3 + F1RVr9p4SR1 PCR | F1RVr9p4K5  | 85600    | 85619 | F         | CTTATGGAGACTACCATGGG            |
| 171 | F1RVr9p3 + F1RVr9p4SR1 PCR | F1RVr9p4K6  | 86389    | 86408 | F         | GAACGAGGTCAAGTAGTTAC            |
| 172 | F1RVr9p3 + F1RVr9p4SR1 PCR | F1RVr9p4K7  | 86932    | 86952 | F         | GCTACACTAACAGTTCCTGTG           |

*Continued on following page*

**Table S2 - Continued.**

| No  | PCR Fragment     | Primer       | Location |        | Direction | Sequence                        |
|-----|------------------|--------------|----------|--------|-----------|---------------------------------|
|     |                  |              | Start    | End    |           |                                 |
| 173 | F87K + R95K PCR  | F87K         | 87199    | 87224  | F         | GTAGCAGGCTACACAGAGTCTACTTC      |
| 174 | F87K + R95K PCR  | F1RVr9p5     | 87333    | 87362  | F         | CGGTGGTGTAAACATTAACAGTTGTAGTGGC |
| 175 | F87K + R95K PCR  | F1RVr9p6     | 87903    | 87927  | F         | GCACCCCTCTTAAGAAGTTACAAGTA      |
| 176 | F87K + R95K PCR  | F1RVr9p7     | 88532    | 88558  | F         | GCCATCTTACTATCAGACGTAGAGGAC     |
| 177 | F87K + R95K PCR  | F1RVr9p8     | 88803    | 88827  | F         | GGCTAGAGGGTACTCGTTGTGGACG       |
| 178 | F87K + R95K PCR  | F1RVr9p9     | 89530    | 89557  | F         | GGTAATTGGGGTTGTCGCTACATGGTTG    |
| 179 | F87K + R95K PCR  | F1RVr9p9-1   | 90375    | 90393  | F         | GCTGAGGAGGCAAGAGCAC             |
| 180 | F87K + R95K PCR  | F1RVr9p9-2   | 91224    | 91246  | F         | GGTTGAGCTTACACTAGTAGAAG         |
| 181 | F87K + R95K PCR  | F1RVr9p9-3   | 92061    | 92081  | F         | CTCTAGTATGGCTAGCTTTGG           |
| 182 | F87K + R95K PCR  | F1RVr9p9-4   | 92861    | 92882  | F         | GTAGGGGACTTCATTTTATGGG          |
| 183 | F87K + R95K PCR  | F1RVr9p9-5   | 93646    | 93666  | F         | GTGTGTAGCGATTGCTATTCC           |
| 184 | F87K + R95K PCR  | F1RVr9p10    | 94097    | 94123  | F         | CCCAAGTAGAGGGTCTTAAACTAGGTG     |
| 185 | F87K + R95K PCR  | F1RVr9p9R    | 94201    | 94173  | R         | CCTCATCAACAACAAACCCTTGCTTGTTTC  |
| 186 | F87K + R95K PCR  | F1RVr9p9R1   | 93317    | 93296  | R         | CTAAACTCAACCTAGCATCTGG          |
| 187 | F87K + R95K PCR  | F1RVr9p9R2   | 92496    | 92474  | R         | CTCTCTGTTGCTATTGAAGCTAG         |
| 188 | F87K + R95K PCR  | F1RVr9p9R3   | 91716    | 91698  | R         | GCCATGGTTTACCTTAGGC             |
| 189 | F87K + R95K PCR  | F1RVr9p9R4   | 90900    | 90881  | R         | GCAAACAGGCACTCTGCCTC            |
| 190 | F87K + R95K PCR  | F1RVr9p9R5   | 90058    | 90040  | R         | GCTCATTGGGATGTGGCGG             |
| 191 | F95K + R102K PCR | F95K         | 94572    | 94598  | F         | GGGGAATGGCTTTATCTGCCTAAGTG      |
| 192 | F95K + R102K PCR | F1RVr9p10-1  | 94711    | 94738  | F         | GGGTAAACTGCTAGAAGTCTCTGATAAC    |
| 193 | F95K + R102K PCR | F1RVr9p10R2  | 96239    | 96219  | R         | GTGGGTTGTAATAGGTAGCAC           |
| 194 | F95K + R102K PCR | F1RVr9p10R3  | 95527    | 95504  | R         | GAAAGCTGTCCCAACCGTCACAC         |
| 195 | F95K + R102K PCR | F1RVr9p10-2  | 95504    | 95527  | F         | GTGTGACGGTTGGGGACAGCTTTC        |
| 196 | F95K + R102K PCR | F1RVr9p9R    | 94201    | 94173  | R         | CCTCATCAACAACAAACCCTTGCTTGTTTC  |
| 197 | F95K + R102K PCR | F1RVr9p10-4  | 97046    | 97070  | F         | CTAATGGGGTTGCTTGTTAGCGTTG       |
| 198 | F95K + R102K PCR | F1RVr9p11    | 97429    | 97455  | F         | GAGTGAGTGGCTACTTAGGACTTAGG      |
| 199 | F95K + R102K PCR | F1RVr9p11-1  | 98195    | 98216  | F         | GACTTCCTCCCTTTACATAGAC          |
| 200 | F95K + R102K PCR | F1RVr9p11-1' | 98249    | 98271  | F         | GCACTAAACATTGCAGAGAATAG         |
| 201 | F95K + R102K PCR | B8M4p3p12    | 100326   | 100299 | R         | GGTATTTTCCCCTAACTCTTTACTAGC     |
| 202 | F95K + R102K PCR | B8M4p3p12-1  | 99493    | 99469  | R         | CTAATGTTTCCATGTTTAGCACTTC       |
| 203 | F95K + R102K PCR | F1RVr9p11-2  | 99555    | 99575  | F         | CGTTAAAAACGGGGTTGACAC           |
| 204 | F95K + R102K PCR | B8M4p3p11R   | 100299   | 100321 | F         | GCTAGTAAAGAGTTAGCGGAAAT         |
| 205 | F95K + R102K PCR | B8M4p3p11R1  | 101079   | 101101 | F         | GAAACTAGAAGAAGTGCCAGAAG         |
| 206 | F95K + R102K PCR | F1RVr9p9R    | 94201    | 94173  | R         | CCTCATCAACAACAAACCCTTGCTTGTTTC  |
| 207 | F95K + R102K PCR | B8M4p3p12    | 100326   | 100299 | R         | GGTATTTTCCCCTAACTCTTTACTAGC     |
| 208 | F95K + R102K PCR | B8M4p3p12-1  | 99493    | 99469  | R         | CTAATGTTTCCATGTTTAGCACTTC       |
| 209 | F95K + R102K PCR | F1RVr9p10R2  | 96239    | 96219  | R         | GTGGGTTGTAATAGGTAGCAC           |
| 210 | F95K + R102K PCR | F1RVr9p10R3  | 95527    | 95504  | R         | GAAAGCTGTCCCAACCGTCACAC         |

*Continued on following page*

**Table S2 - Continued.**

| No  | PCR Fragment      | Primer        | Location |        | Direction | Sequence                       |
|-----|-------------------|---------------|----------|--------|-----------|--------------------------------|
|     |                   |               | Start    | End    |           |                                |
| 211 | F101K + R108R PCR | B8M4p3p11R1   | 101079   | 101101 | F         | GAAACTAGAAGAAGTGCCAGAAG        |
| 212 | F101K + R108R PCR | B8M4p3p11R1.1 | 101767   | 101787 | F         | CACTTATAGGGGAGAGATAG           |
| 213 | F101K + R108R PCR | B8M4p3p11R2   | 101970   | 101988 | F         | GAAAGGGGGAGGGAAAAGG            |
| 214 | F101K + R108R PCR | B8M4p3p11R3   | 102785   | 102804 | F         | GCCTATTTTAGAGGGCTACC           |
| 215 | F101K + R108R PCR | B8M4p3p11R4   | 103568   | 103585 | F         | GGAGGGGGCTACAATGGAC            |
| 216 | F101K + R108R PCR | B8M4p3p11R5   | 104400   | 104418 | F         | CGGGGGCTACTAACATGAC            |
| 217 | F101K + R108R PCR | B8M4p3p10R    | 104862   | 104886 | F         | GTAAAGTACCGAGTGAGTTGCTAA       |
| 218 | F101K + R108R PCR | B8M4p3p10R1   | 105656   | 105673 | F         | GGGAACGACATCGACAAC             |
| 219 | F101K + R108R PCR | B8M4p3p10R2   | 106514   | 106537 | F         | CAGACACGACTATTGCATTCTTTG       |
| 220 | F101K + R108R PCR | B8M4p3p9R3    | 107369   | 107388 | F         | GGAAAAGGGCACGGCCTTG            |
| 221 | F101K + R108R PCR | B8M4p3p8R     | 107938   | 107962 | F         | CCCATATAAAAAGACCCCTCCCCGT      |
| 222 | F101K + R108R PCR | B8M4p3p10     | 107626   | 107602 | R         | CAAGCCCAACCCGCTTACTGCTTGT      |
| 223 | F101K + R108R PCR | B8M4p3p9-2    | 106771   | 106749 | R         | CATAGACTTGCTGTAATTCCTCG        |
| 224 | F101K + R108R PCR | B8M4p3p9-3    | 105900   | 105882 | R         | CCCCTCTGACTCTATAACC            |
| 225 | F101K + R108R PCR | B8M4p3p9-4    | 105341   | 105323 | R         | GTTCCGGTCTCGTTCATTG            |
| 226 | F101K + R108R PCR | B8M4p3p11     | 105062   | 105038 | R         | GCGACTAACGTTAACACCTAACAAAC     |
| 227 | F101K + R108R PCR | B8M4p3p11-1   | 104645   | 104621 | R         | CGTGTTTAGCTTCTATAACCGTGTC      |
| 228 | F101K + R108R PCR | B8M4p3p11-2   | 103889   | 103865 | R         | CGTCTAGTGTGCTGTATTCTCTTC       |
| 229 | F101K + R108R PCR | B8M4p3p11-3   | 103078   | 103054 | R         | CGGGACTCTGGTCTACTATATCTCC      |
| 230 | F101K + R108R PCR | B8M4p3p11-4   | 102242   | 102221 | R         | GATATAAGCGCCCCCTATATAG         |
| 231 | F101K + R108R PCR | B8M4p3p11-5   | 101365   | 101344 | R         | CTAGGTACTTTCTAACCTCCTC         |
| 232 | F108K + R115K PCR | F108K         | 108078   | 108104 | F         | GTCACCACTCTCCACAATGTAGTAGTC    |
| 233 | F108K + R115K PCR | B8M4p3p8R1    | 108751   | 108771 | F         | GTCACACTAGTTACTGTTGCC          |
| 234 | F108K + R115K PCR | B8M4p3p8R2    | 109612   | 109631 | F         | CGGTAGGTACTGTGTACTC            |
| 235 | F108K + R115K PCR | B8M4p3p8R3    | 110347   | 110368 | F         | GTATAGTCTTCTCACCTGTG           |
| 236 | F108K + R115K PCR | B8M4p3p7R1    | 111759   | 111782 | F         | GGGTAACCTCTTTGTCAATCATG        |
| 237 | F108K + R115K PCR | B8M4p3p7R2    | 112561   | 112579 | F         | GTGGGTAGCTGTTGCCATC            |
| 238 | F108K + R115K PCR | B8M4p3p7R3    | 113408   | 113430 | F         | CTGCCTCTACTGCAGTCTTATAC        |
| 239 | F108K + R115K PCR | B8M4p3p6      | 114475   | 114446 | R         | GATTAAGCTAAGAGAGCGGGGTATATTTGG |
| 240 | F108K + R115K PCR | B8M4p3p6-1    | 113765   | 113743 | R         | CACCCATTATGCACAGAAAGACG        |
| 241 | F108K + R115K PCR | B8M4p3p7      | 113569   | 113554 | R         | GTCACGTAGAGGACGAGGAATAGTG      |
| 242 | F108K + R115K PCR | B8M4p3p7R4    | 114133   | 114151 | F         | CCTTCTGTGTCATTGCCTG            |
| 243 | F108K + R115K PCR | B8M4p3p5R     | 114296   | 114325 | F         | CTGAATACCCGTTCTAGGTCATTCAATGAG |
| 244 | F108K + R115K PCR | B8M4p3p5R1    | 115101   | 115120 | F         | CTCCAAGCTCTACCACAAAG           |
| 245 | F108K + R115K PCR | 110831F       | 110830   | 110852 | F         | CCCCTGAACCTCCGAGACGTGGC        |
| 246 | F108K + R115K PCR | 111955R       | 111954   | 111929 | R         | CTCAAGTAGAGTGTGACGGTACATTG     |

*Continued on following page*

**Table S2 - Continued.**

| No  | PCR Fragment                     | Primer               | Location |        | Direction | Sequence                     |
|-----|----------------------------------|----------------------|----------|--------|-----------|------------------------------|
|     |                                  |                      | Start    | End    |           |                              |
| 247 | F115K +R122K PCR                 | F115K                | 115044   | 115071 | F         | GTACAGATGCTAGTAGTTCGTGGTCTTC |
| 248 | F115K +R122K PCR                 | B8M4p3p5R2           | 115892   | 115912 | F         | CCCTCAATAGGTGCAGTGAAC        |
| 249 | F115K +R122K PCR                 | B8M4p3p5R3           | 116761   | 116780 | F         | GCAGATTGGAGGAGCTCATC         |
| 250 | F115K +R122K PCR                 | B8M4p3p5R4           | 117621   | 117643 | F         | CGTACTCTGCTTTCTCAACAAAC      |
| 251 | F115K +R122K PCR                 | B8M4p3p3R            | 118338   | 118362 | F         | CTTCCATTGTCTTGCCCTCCCTATC    |
| 252 | F115K +R122K PCR                 | B8M4p3p3R1           | 119156   | 119176 | F         | CCCTCACTACTTGCTACCTCC        |
| 253 | F115K +R122K PCR                 | B8M4p3p3R2           | 122021   | 120042 | F         | CTGCTAGCCAGTAAGTAGCTAG       |
| 254 | F115K +R122K PCR                 | B8M4p3p3R3           | 120848   | 120870 | F         | CTGGTGAGTCTACCCCTACATTC      |
| 255 | F115K +R122K PCR                 | B8M4p3p2-4           | 121766   | 121745 | R         | GAGGGAGCACCTAACGAATATG       |
| 256 | F115K +R122K PCR                 | B8M4p3p3R4           | 121616   | 121638 | F         | GCGATATAGTCACTCTGTAAGGC      |
| 257 | F122K + R130K                    | B8M4p3p2-3           | 122556   | 122542 | R         | GCCAATACTCATTGAGGAATGG       |
| 258 | F122K + R130K                    | B8M4p3p3R5           | 122430   | 122450 | F         | GTAGCCCACCGTTTCGTTGTG        |
| 259 | F122K + R130K                    | B8M4p3p3R6           | 123240   | 123263 | F         | GCAGTCATCACTTAAAGCATTATC     |
| 260 | F122K + R130K                    | B8M4p3p3R7           | 124100   | 124123 | F         | CCCTACTATTGTGATTCTGTCAAC     |
| 261 | F122K + R130K                    | B8M4p3p2R1           | 124872   | 124896 | F         | CTTGCTCACTGGTTGCTTTACTGG     |
| 262 | F122K + R130K                    | B8M4p3-7             | 125901   | 125880 | R         | GAGGTAGAAGTACCAAAACAGG       |
| 263 | F122K + R130K                    | B8M4p3p2R2           | 125762   | 125786 | F         | GCGAAAAACCATTTACTAAACTCTG    |
| 264 | F122K + R130K                    | B8M4p3p2R3           | 126635   | 126655 | F         | CTACGTCATCCTCTCATTAGC        |
| 265 | F122K + R130K                    | B8M4p3p2R4           | 127497   | 127516 | F         | CTTACTCATAGGCTACCTCC         |
| 266 | F122K + R130K                    | E5M4rp1              | 128013   | 128038 | F         | GCATGACGAGACATCTCATGCTC      |
| 267 | F122K + R130K                    | B8M4p3p2R5           | 128311   | 128332 | F         | CCCTACAGTGTGTTGCCATAACC      |
| 268 | F122K + R130K                    | B8M4p3 <sup>-1</sup> | 130901   | 130882 | R         | CCCAACAACAAGTGCAGACG         |
| 269 | F122K + R130K                    | B8M4p3-2             | 130043   | 130023 | R         | CGGTAGGTGTGCCTGACGTTG        |
| 270 | F122K + R130K                    | R130K                | 130004   | 129978 | R         | CAATTGATGCAATCATCCGCTCAGGAC  |
| 271 | B8M4p3 <sup>+</sup> +E5M4rp1 PCR | B8M4p3p2R6           | 129122   | 129145 | F         | CCATGCTCTTTTTAGCTGTTCTTC     |
| 272 | B8M4p3 <sup>+</sup> +E5M4rp1 PCR | B8M4p3 <sup>-1</sup> | 130901   | 130882 | R         | CCCAACAACAAGTGCAGACG         |
| 273 | B8M4p3 <sup>+</sup> +E5M4rp1 PCR | B8M4p3-2             | 130043   | 130023 | R         | CGGTAGGTGTGCCTGACGTTG        |
| 274 | B8M4p3 <sup>+</sup> +E5M4rp1 PCR | R130K                | 130004   | 129978 | R         | CAATTGATGCAATCATCCGCTCAGGAC  |

*Continued on following page*

**Table S2 - Continued.**

| No  | PCR Fragment      | Primer         | Location |        | Direction | Sequence                     |
|-----|-------------------|----------------|----------|--------|-----------|------------------------------|
|     |                   |                | Start    | End    |           |                              |
| 275 | F130K + R137K PCR | F130K          | 129747   | 129774 | F         | CACCTACGATTGTAGTTACCCAACCATG |
| 276 | F130K + R137K PCR | B8M4p3p2R8     | 130733   | 130756 | F         | CTATACTAAACTAGCTAGCTTGTC     |
| 277 | F130K + R137K PCR | B8M4p3p2R9     | 131494   | 131515 | F         | CCGATTCTGATTGAACTGTGTC       |
| 278 | F130K + R137K PCR | B8RVp1         | 132259   | 132278 | F         | CTTCTGCCACCTTACTAGAG         |
| 279 | F130K + R137K PCR | B8RVp2         | 133006   | 133024 | F         | CCCCAGACTCAGCTAGCTC          |
| 280 | F130K + R137K PCR | Atorf34 R5     | 133787   | 133810 | F         | GAATGCTCTAACAGCTCTTTATC      |
| 281 | F130K + R137K PCR | Atorf34R5-3    | 134474   | 134496 | F         | CCTTCATCGTTCGTGTATGTTCC      |
| 282 | F130K + R137K PCR | B8RVp3p1-2     | 135788   | 135806 | F         | CAACAGGCTGTAGTCCACC          |
| 283 | F130K + R137K PCR | Atorf34 R2     | 136531   | 136550 | F         | GTTTGCGCAGGCAACTTATC         |
| 284 | F130K + R137K PCR | B8M4p3'-1      | 130901   | 130882 | R         | CCCAACAACAAGTGCAGACG         |
| 285 | F130K + R137K PCR | Atorf34F2'-1   | 136041   | 136022 | R         | CGACTACCCTGATGCAGACG         |
| 286 | F130K + R137K PCR | Sg1Rp2         | 135815   | 135791 | R         | caatttgaaggtgactacagcctg     |
| 287 | F137K + R1K PCR   | Atorf34 R1-p3r | 137350   | 137331 | R         | GAGTACTCTAAGAGGTAGG          |
| 288 | F137K + R1K PCR   | Atorf34 R1-p2  | 137097   | 137115 | F         | CTGAGAATAGGCGCAGACC          |
| 289 | F137K + R1K PCR   | Atorf34 R1-p3  | 137464   | 137483 | F         | GTCATGTTGCCTGCTGAATC         |
| 290 | F137K + R1K PCR   | Atorf34 R1-p4  | 137923   | 137941 | F         | GAGAGGATTTGAACCCCTC          |
| 291 | F137K + R1K PCR   | Atorf34 R1-p5  | 138413   | 138435 | F         | CTTAGGGAGGTATAACAAGTATG      |
| 292 | F137K + R1K PCR   | Atorf34 R1-p6  | 138868   | 138887 | F         | GTTGGCGCTAAGTTAGTGAG         |
| 293 | F137K + R1K PCR   | Atorf34 R1-p7  | 139402   | 139420 | F         | GCTAACTCCCAGTGATAAG          |
| 294 | F137K + R1K PCR   | Atorf34 R1-p8  | 139978   | 139995 | F         | CTCACGCTTCCACCTAAC           |
| 295 | F137K + R1K PCR   | Atorf34 R1-p9  | 140491   | 140510 | F         | CAAACCTACCCTGAGTGCTCC        |
| 296 | F137K + R1K PCR   | Atorf34 R1-p10 | 141056   | 141073 | F         | GTCCCAATCTGACTTCC            |
| 297 | F137K + R1K PCR   | Atorf34 R1-p11 | 141648   | 141666 | F         | CACTAACCGCACTATTTCAG         |
| 298 | F137K + R1K PCR   | Atorf34 R1-p12 | 213      | 229    | F         | GTAGAACAAAATGCCCC            |
| 299 | F137K + R1K PCR   | orf34 F1'      | 899      | 918    | F         | CCTGTACCTTCTTGCAITCC         |

On the rows numbered 68 and 69 shown in page 3, primers used for mutation detection were shown.
